# Supplementary material for: The Long Terminal Repeats of ERV6 Are Activated in Pre-Implantation Embryos of Cynomolgus Monkey
Source: MDPI journal article supplement (doi:10.3390/cells10102710), 2021-10-09
Supplement: s1 [file s1]

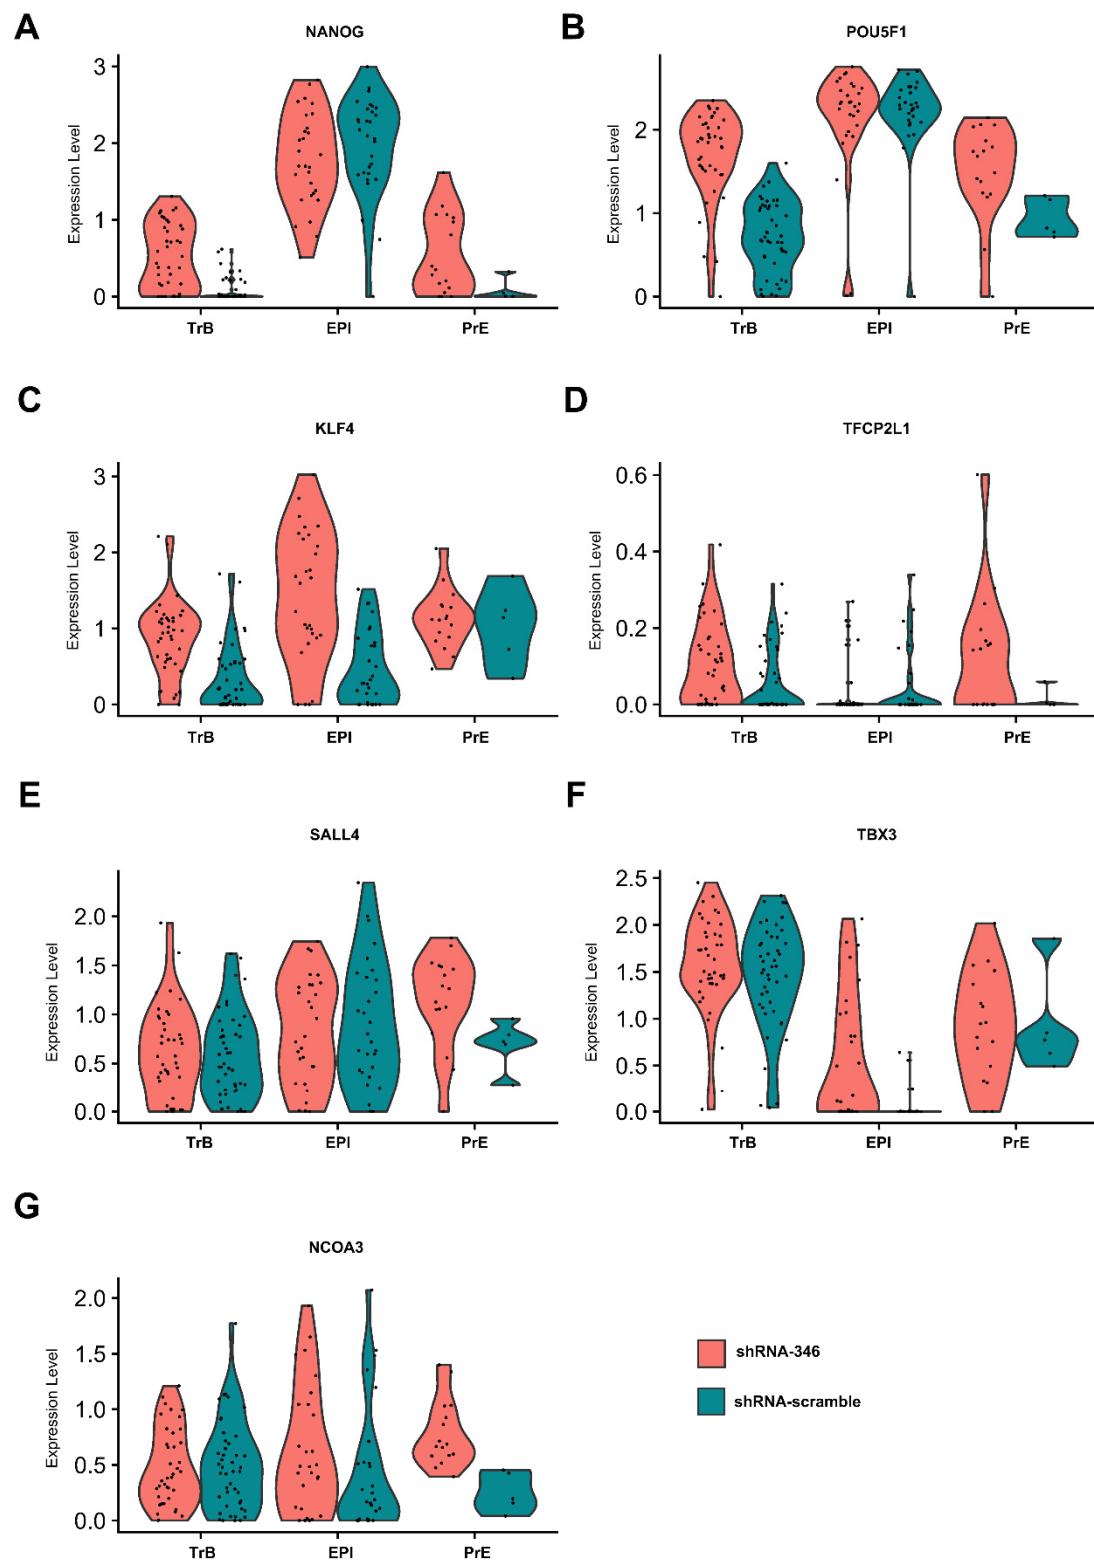

Figure S2 (A-G) Vinplots of *NANOG*, *POU5F1*, *KLF4*, *TFCP2L1*, *SALL4*, *TBX3*, and *NCOA3* expression in TrB, EPI, and PrE cells which treated with shRNA-346 and shRNA-scramble lentivirus.
