# Supplementary material for: The Long Terminal Repeats of ERV6 Are Activated in Pre-Implantation Embryos of Cynomolgus Monkey
Source: MDPI journal article supplement (doi:10.3390/cells10102710), 2021-10-09
Supplement: s1 [file s1]

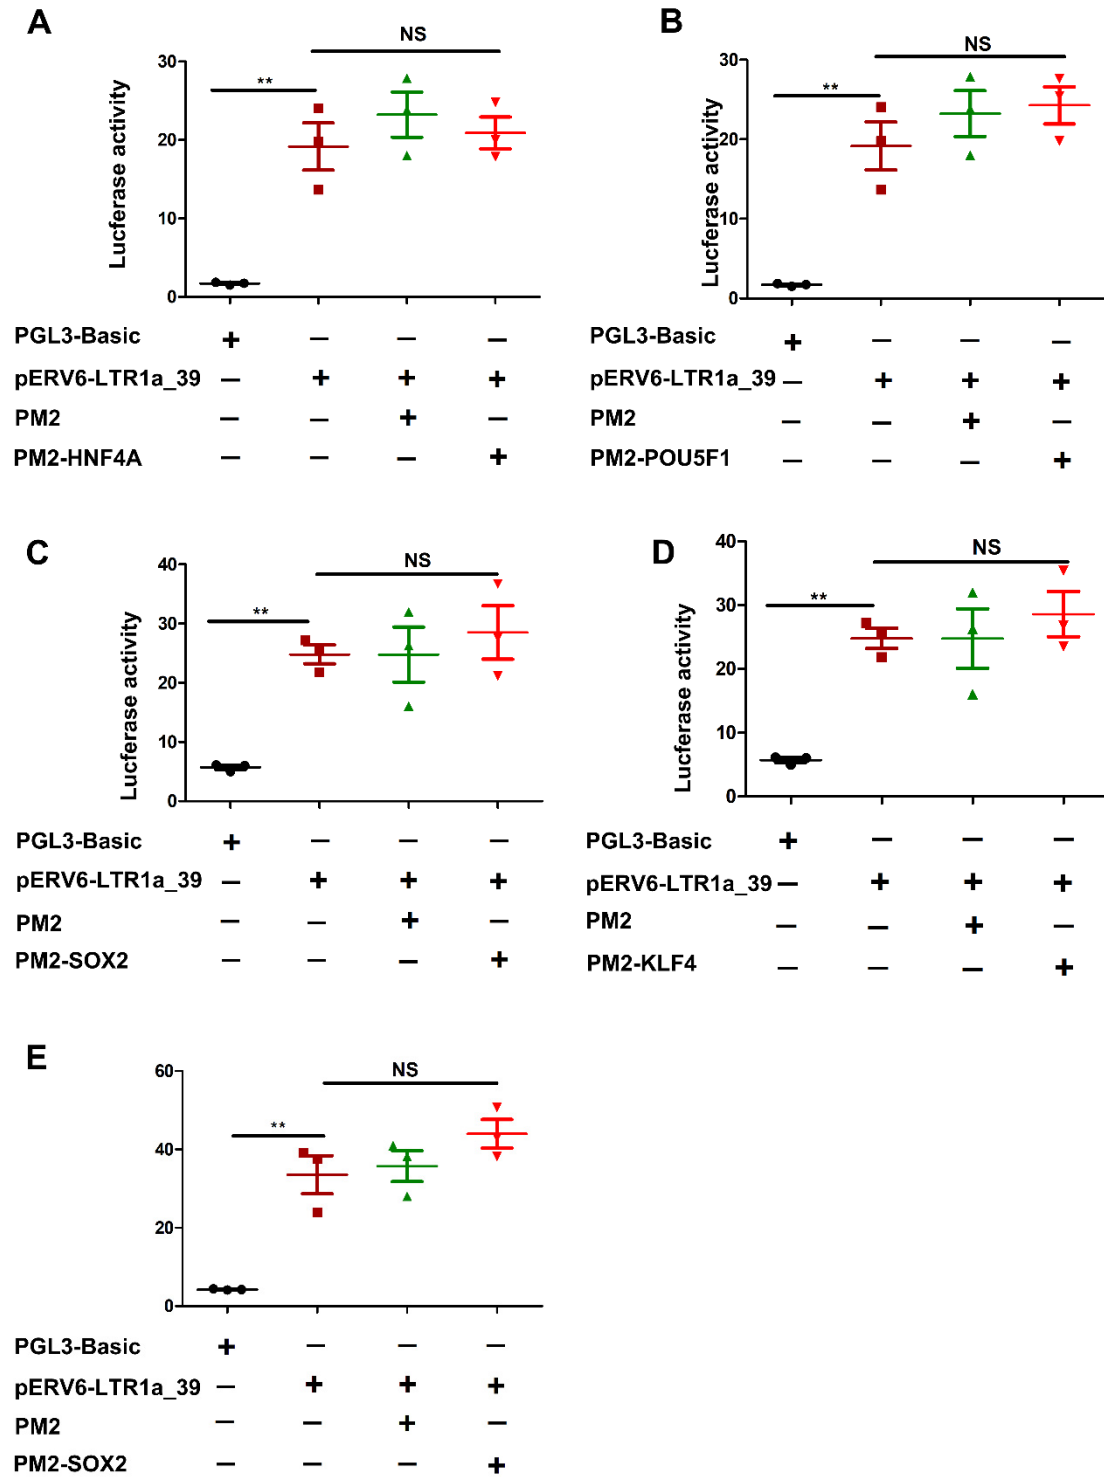

Figure S1 *In vitro* MacERV6-LTR1a interactions with pluripotency factors. (A-E) The efficiency of specific TFs, such as SMAD3, SOX2, KLF4, POU5F1 or HNF4A, interact with pERV6-LTR1a\_39 elements in 293T cells by luciferase assay. The coding sequences of these genes were cloned into the PM2 expression vector. PGL3-basic: control plasmid without promoter, pERV6-LTR1a\_39 plasmid containing the luciferase reporter driven by MacERV6-LTR1a\_39, PM2: control plasmid without coding sequence of TFs. \*\**p-value* < 0.01. NS, not significant. Student's *t-test*.
